# Supplementary material for: Induction of myasthenia by immunization against muscle-specific kinase
Source: JCI journal article supplement (doi:10.1172/jci21545), 2006-03-24
Supplement: sd1 [file 1]

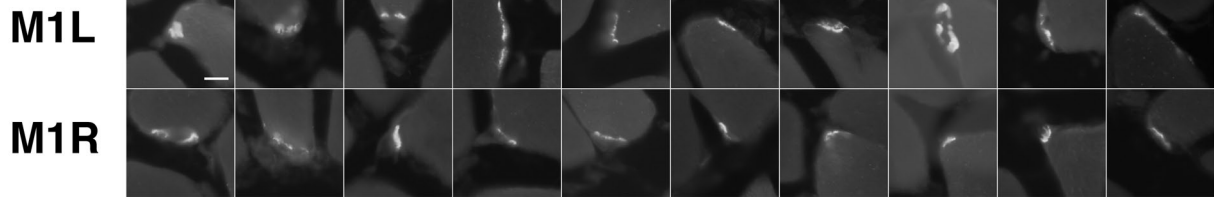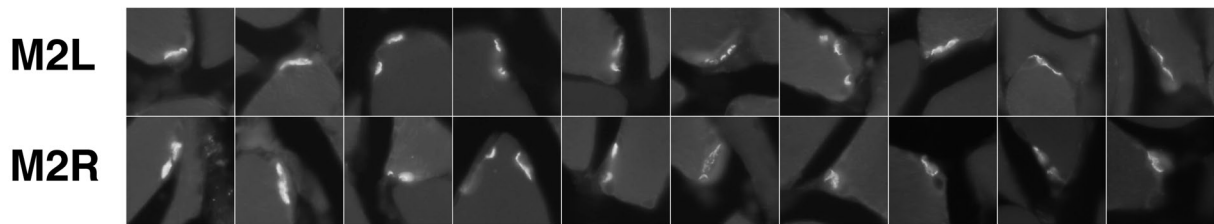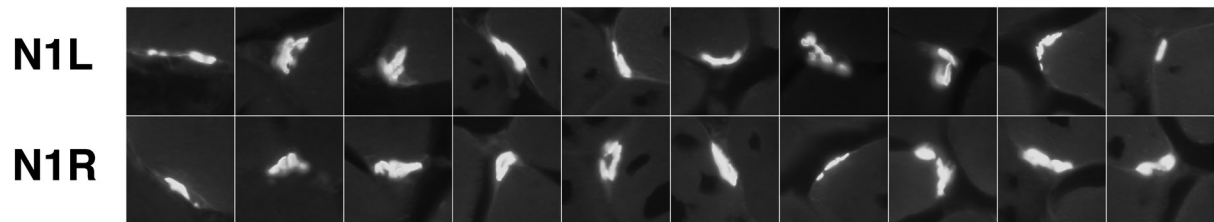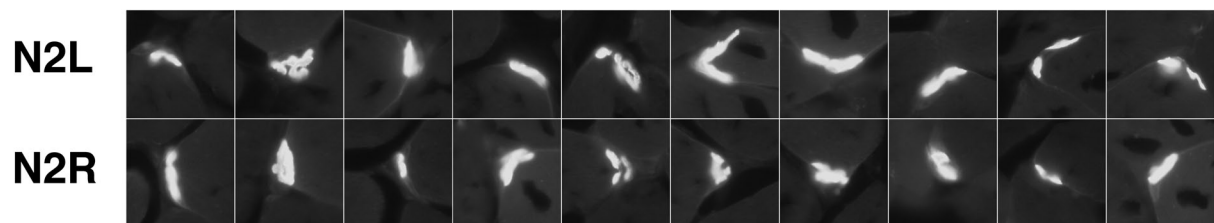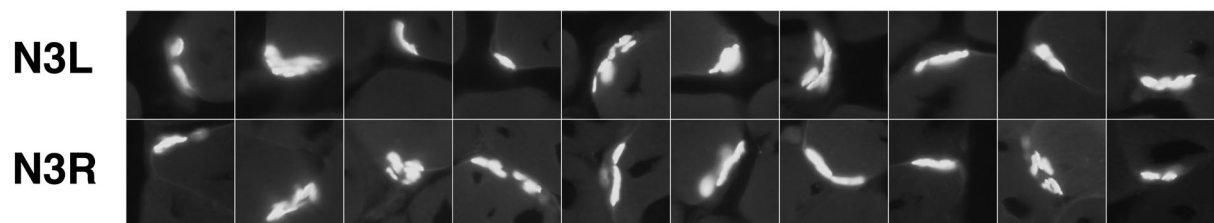

### **Supplementary Movie 1 and 2**

M1 and M2 paretic rabbits manifested myasthenic weakness after immunization with recombinant MuSK protein were recorded in Movie 1 and Movie 2 respectively. M2 paretic rabbit manifested severe exhaustion with muscle weakness.

### **Supplementary Figure 1**

Ten AChR clusters of NMJ randomly stained with 10 nM rhodamine-conjugated BTX chosen from the left and ten from the right soleus muscles in the paretic (M1 and M2) and normal (N1, N2 and N3) rabbits. These unprocessed digitized images were analyzed using NIH image analysis software. Scale bar, 10  $\mu\text{m}$ .
